# Supplementary material for: Introducing kalium into copper sulfide for the enhancement of thermoelectric properties
Source: Royal Society of Chemistry journal article supplement (doi:10.1039/c3ta12706k), 2013-01-01
Supplement: c3ta12706k.pdf [file c3ta12706k.pdf]

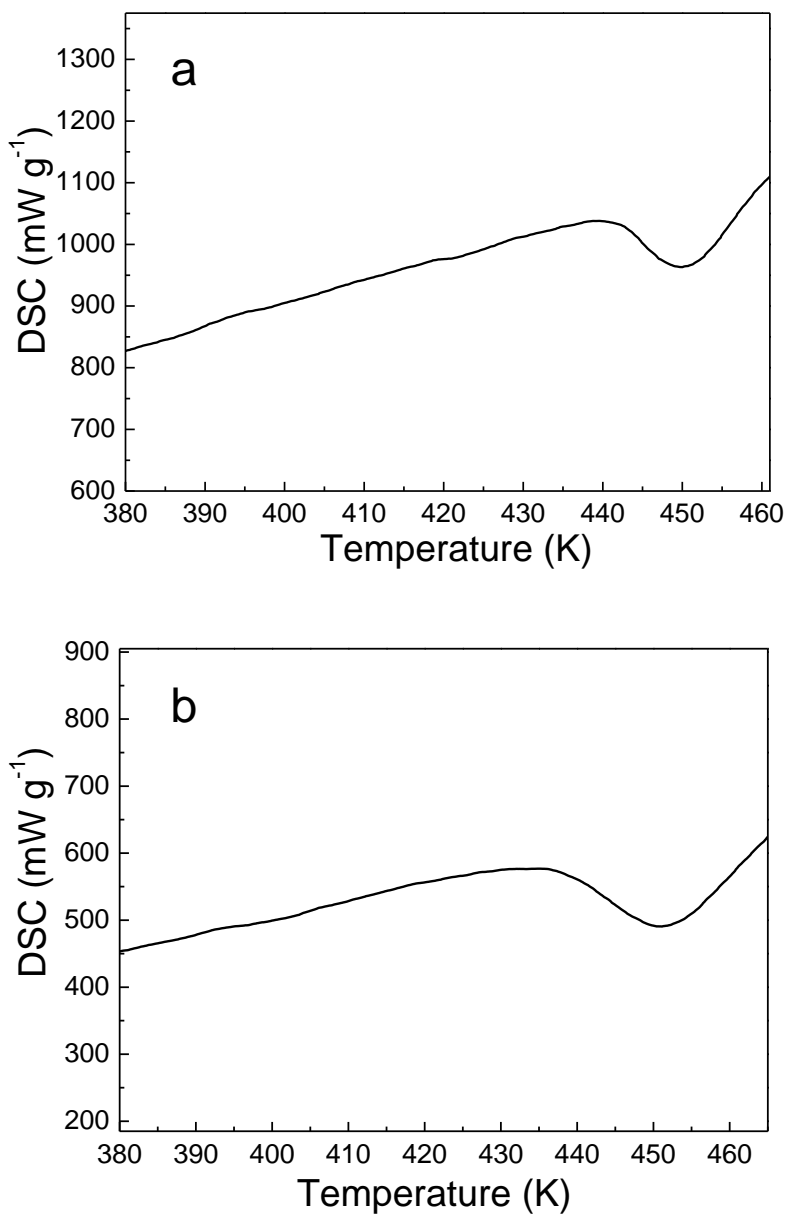

Fig.S1. DSC of the  $\text{KCu}_{7-x}\text{S}_4$  (a) and  $\text{Cu}_7\text{S}_4$  (b) films.

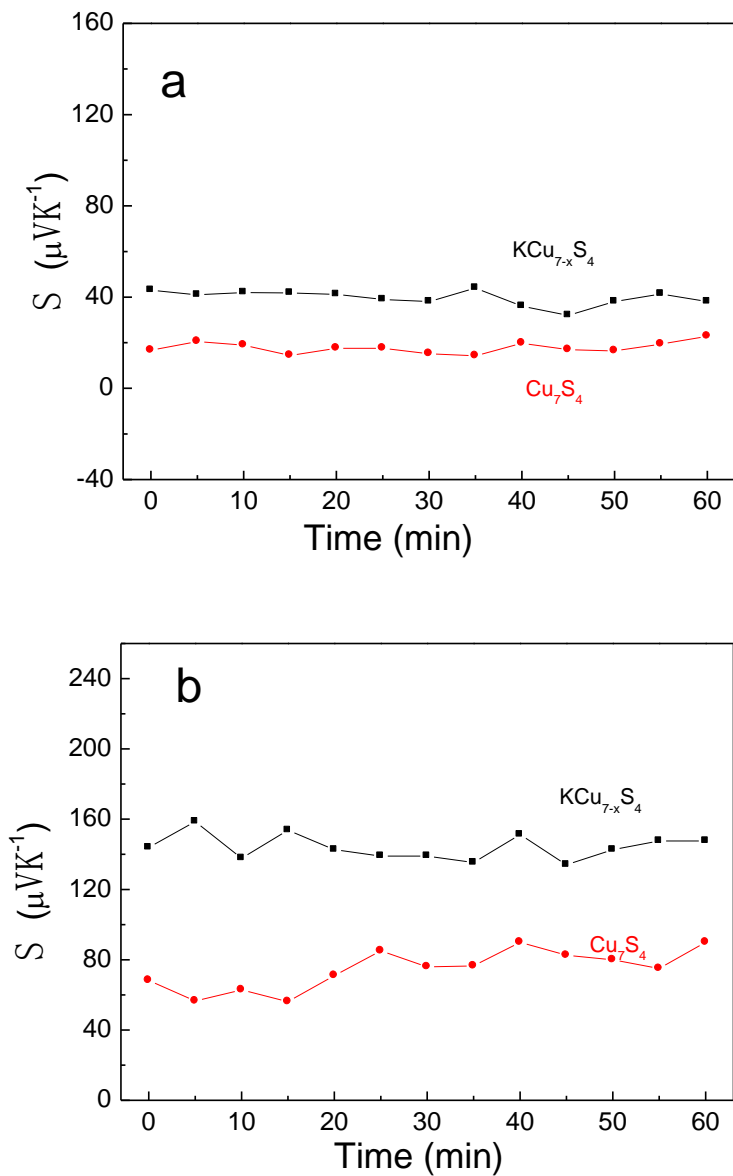

Fig. S2. Seebeck coefficient stability of the films at 320 K (a) and 510 K (b) for an hour.
